# Supplementary material for: Ion migration mechanism in all-inorganic Ruddlesden–Popper lead halide perovskites by first-principles calculations
Source: Royal Society of Chemistry journal article supplement (doi:10.1039/d1cp03631a), 2021-12-07
Supplement: d1cp03631a1.pdf [file d1cp03631a1.pdf]

## **Electronic supplementary information**

### **Ion migration mechanism in all-inorganic Ruddlesden-Popper lead halide perovskites by first-principles calculations**

Shuai Zhao<sup>1,2,\*</sup> and Li Xiao<sup>1,2,\*</sup>

<sup>1</sup>School of Science, Chongqing University of Technology, Chongqing 400054, P. R. China.

<sup>2</sup>Chongqing Key Laboratory of Green Energy Materials Technology and Systems, Chongqing 400054, P.R. China

Email: [zhaoshuai@cqut.edu.cn](mailto:zhaoshuai@cqut.edu.cn); [xiaoli@cqut.edu.cn](mailto:xiaoli@cqut.edu.cn)

**Table S1.** Optimized lattice constants  $a$  and  $c$  and bond length of Pb-X for all-inorganic 3D CsPbI<sub>3</sub>, 2D RP Cs<sub>2</sub>PbX<sub>4</sub> (X = Cl, Br, I) and mixed-halide RP Cs<sub>2</sub>PbI<sub>2</sub>Cl<sub>2</sub>.

|                                                  | $a$ (Å) | $c$ (Å) | $r_{\text{Pb-X}}$ (Å) |
|--------------------------------------------------|---------|---------|-----------------------|
| CsPbI <sub>3</sub>                               | 6.38    | -       | 3.19                  |
| Cs <sub>2</sub> PbCl <sub>4</sub>                | 5.71    | 17.58   | 2.85 (//), 2.88 (⊥)   |
| Cs <sub>2</sub> PbBr <sub>4</sub>                | 5.96    | 18.39   | 2.98 (//), 3.03 (⊥)   |
| Cs <sub>2</sub> PbI <sub>4</sub>                 | 6.36    | 19.57   | 3.18 (//), 3.23 (⊥)   |
| Cs <sub>2</sub> PbI <sub>2</sub> Cl <sub>2</sub> | 5.75    | 19.50   | 2.87 (//), 3.24 (⊥)   |

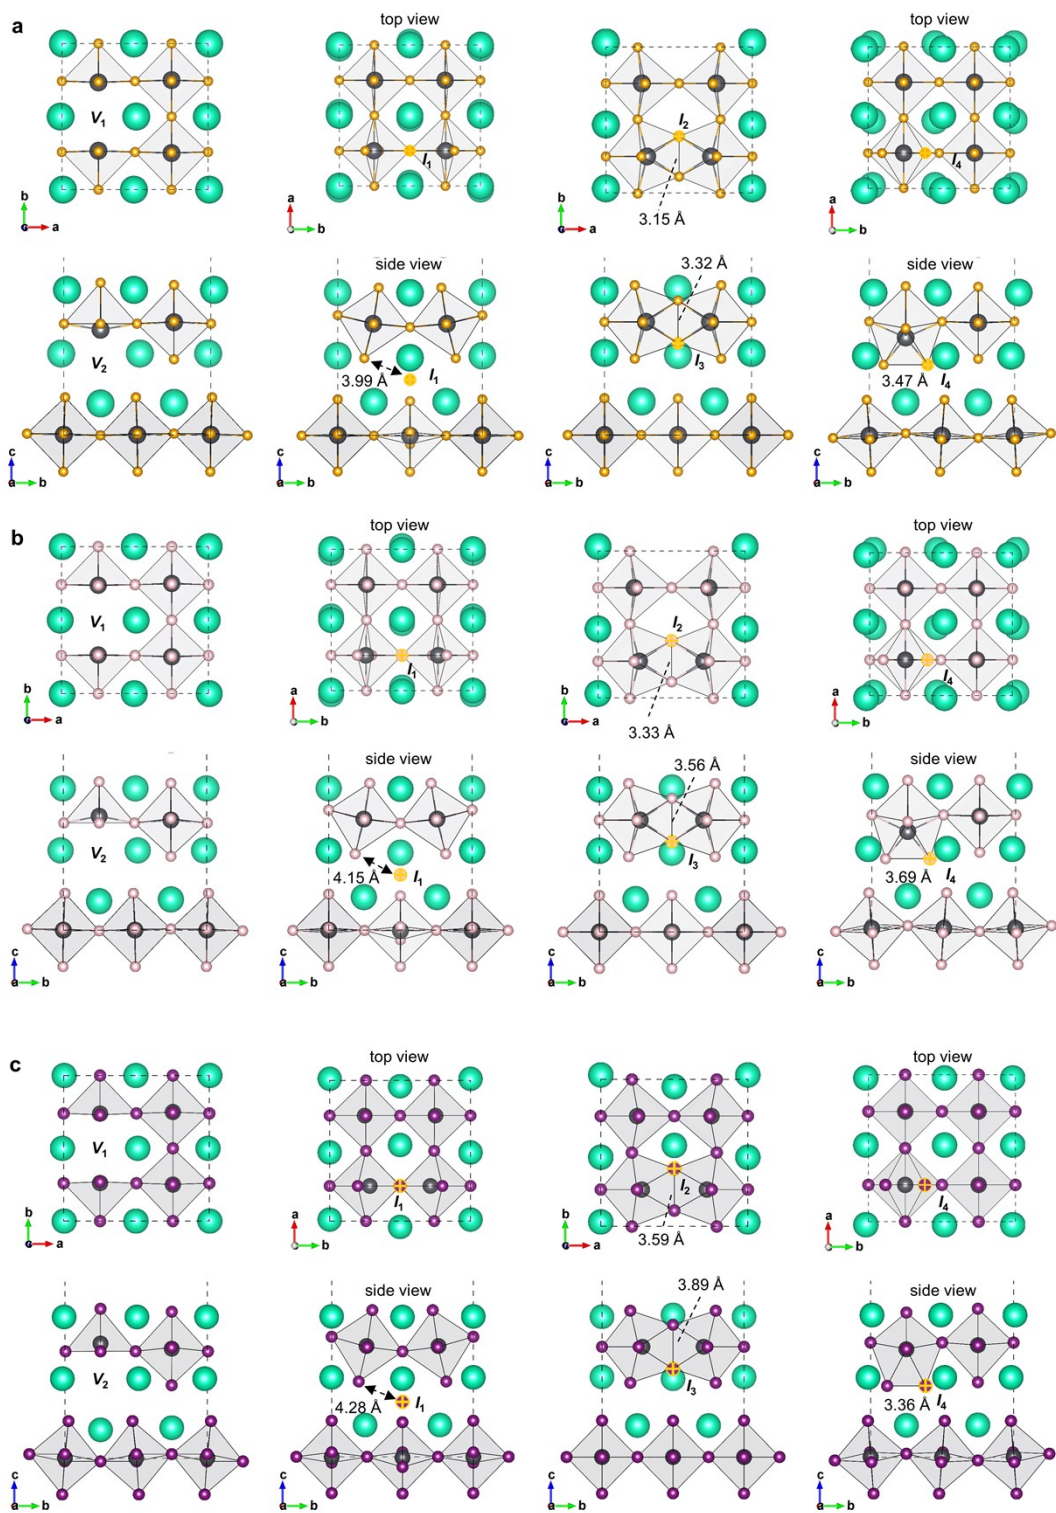

**Figure S1.** Optimized structures with different vacancies and interstitials for (a)  $\text{Cs}_2\text{PbCl}_4$ , (b)  $\text{Cs}_2\text{PbBr}_4$  and (c)  $\text{Cs}_2\text{PbI}_4$ .

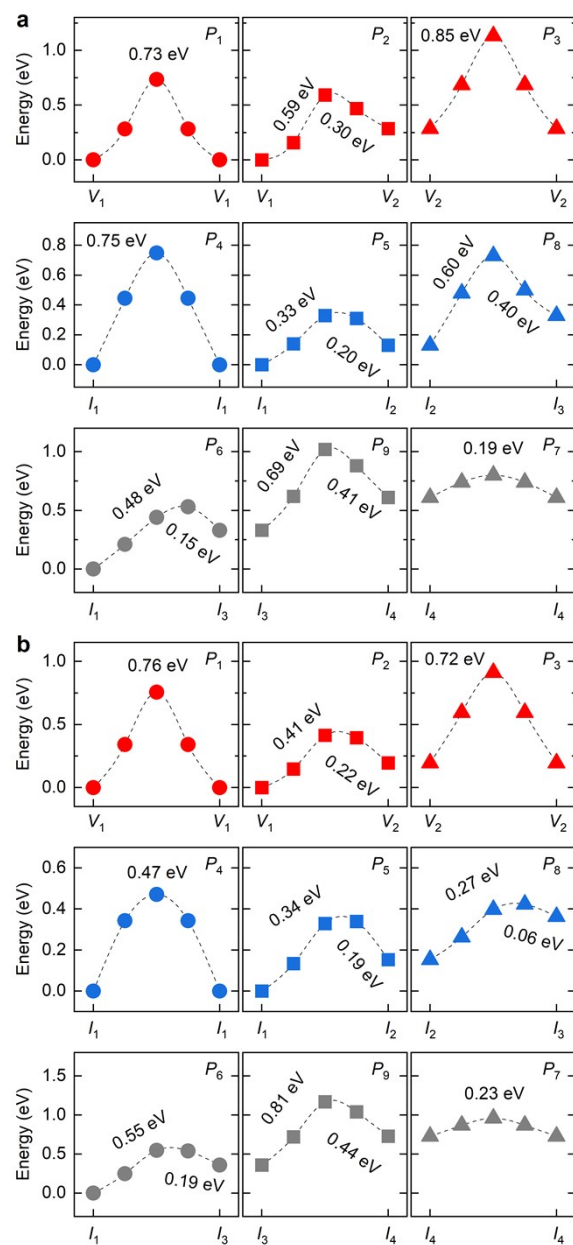

**Figure S2.** Calculated energy profiles for different migrations of halide vacancies and interstitials in (a)  $\text{Cs}_2\text{PbCl}_4$  and (b)  $\text{Cs}_2\text{PbBr}_4$  using the CINEB method.

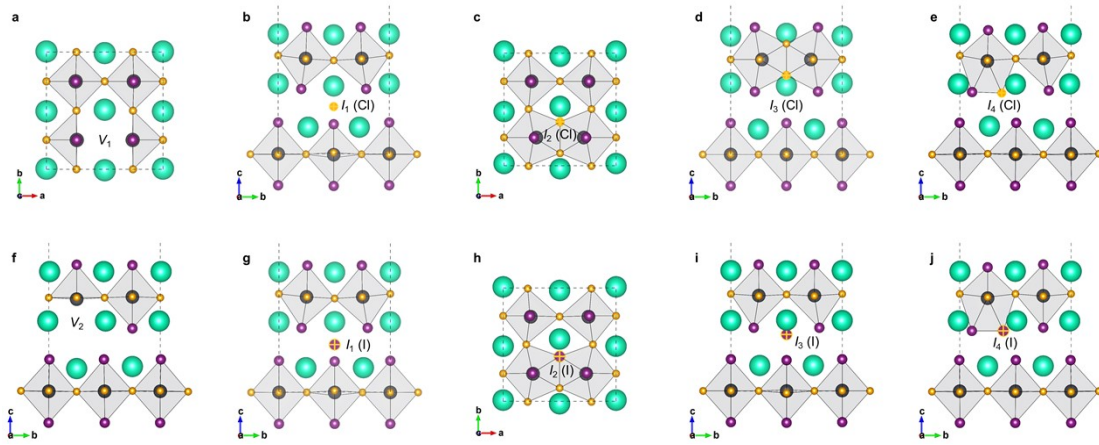

**Figure S3.** Optimized structures containing different defects in the mixed-halide RP  $\text{Cs}_2\text{PbI}_2\text{Cl}_2$ . (a) the vacancy at the 4c site; (b) the vacancy at the 4e site; the isolated  $I_1$  interstitial of (c) Cl and (d) I; the  $I_2$  interstitial of (e) Cl and (f) I; the  $I_2$  interstitial of (g) Cl and (h) I; the  $I_2$  interstitial of (i) Cl and (j) I.

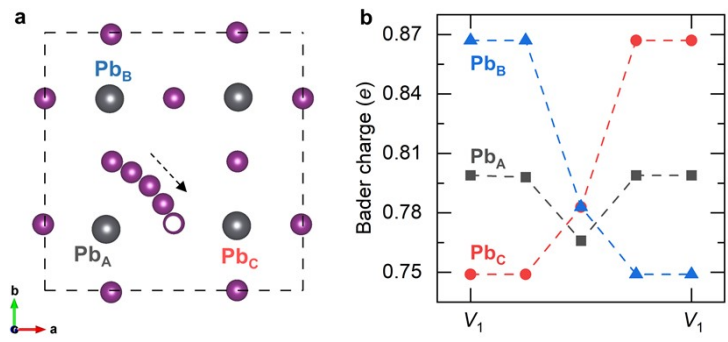

**Figure S4.** (a) The  $P_1$  migration of RP  $\text{Cs}_2\text{PbI}_4$ , and (b) calculated Bader charges for Pb cations adjacent to the hopping I ions.

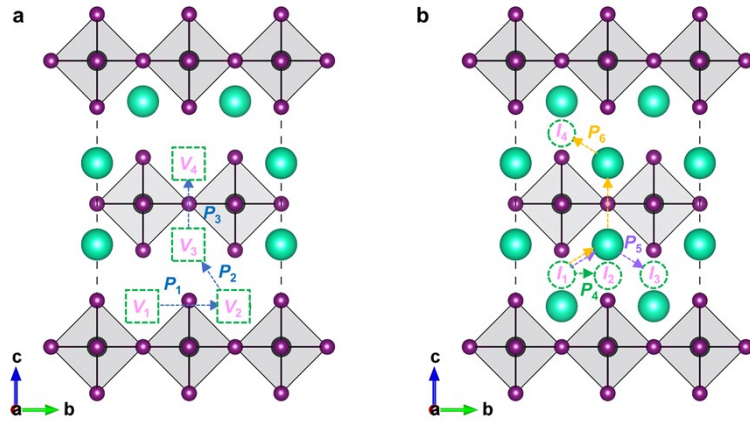

**Figure S5.** Simulated migration paths for Cs cations in these RP halide perovskites.

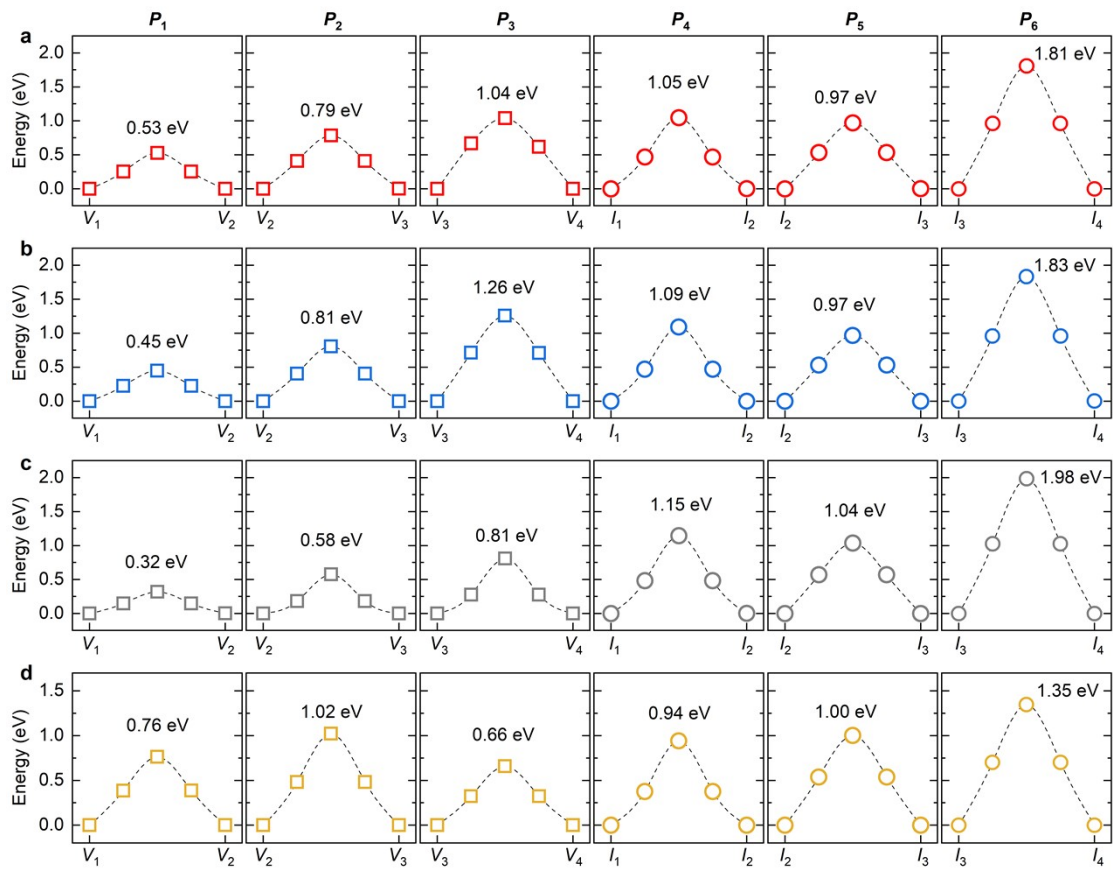

**Figure S6.** Calculated energy profiles of various migrations for Cs cations in (a)  $\text{Cs}_2\text{PbCl}_4$ , (b)  $\text{Cs}_2\text{PbBr}_4$ , (c)  $\text{Cs}_2\text{PbI}_4$  and (d)  $\text{Cs}_2\text{PbI}_2\text{Cl}_2$ .
